# Supplementary material
Source: PubMed Central journal article supplement (PMC4785827)
Supplement: NIHMS765277-supplement-ESM1.pdf [file NIHMS765277-supplement-ESM1.pdf]

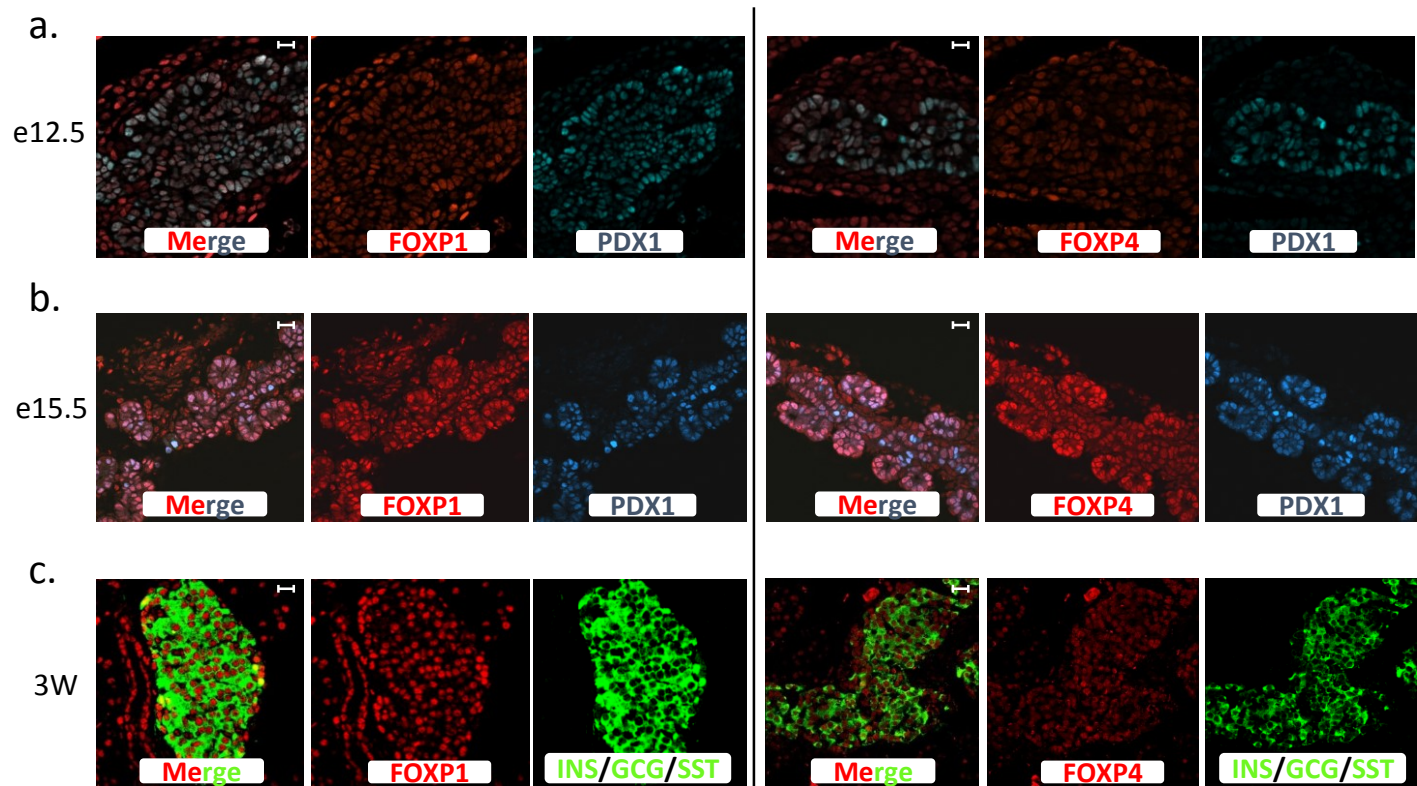

**ESM Fig. 1: FOXP1 and FOXP4 are broadly produced in the developing and adult pancreas.** Sections of WT e12.5 (a.), e15.5 (b.) and 3W (c.) postnatal pancreata were subjected to immunofluorescence analysis for FOXP1 or FOXP4. PDX1 was used in a-b to indicate pancreatic regions. Insulin (INS), Glucagon (GCG) and Somatostatin (SST) were used in 3W samples to mark islet endocrine cells. Scale bars = 20 $\mu$ m.
