# Supplementary material
Source: PubMed Central journal article supplement (PMC4785827)
Supplement: NIHMS765277-supplement-ESM2.pdf [file NIHMS765277-supplement-ESM2.pdf]

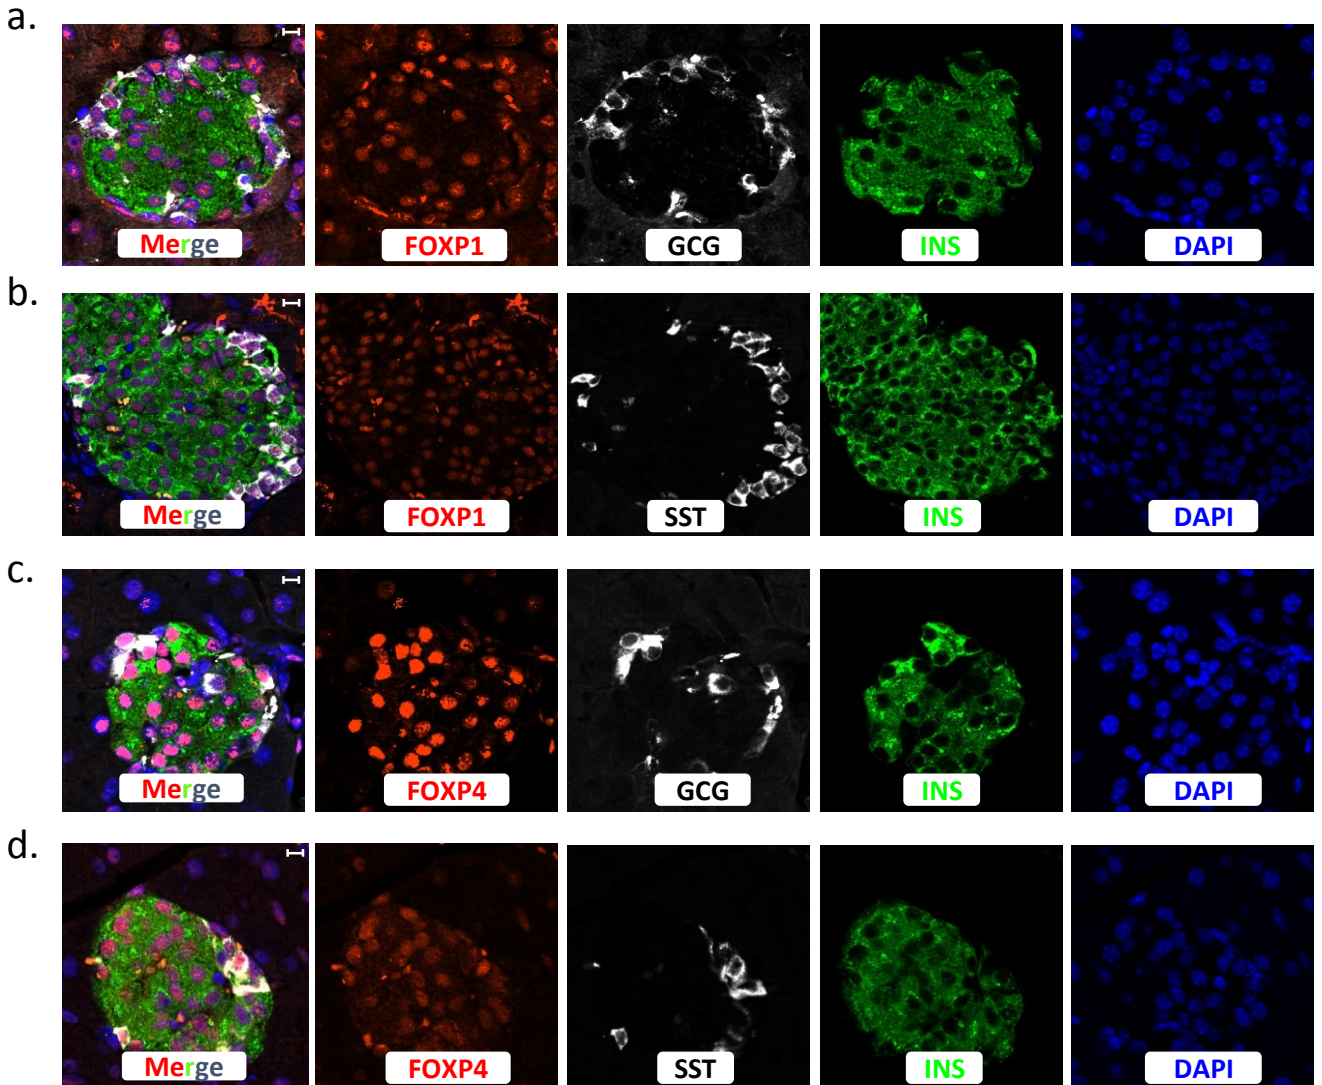

**ESM Fig. 2: FOXP1 and FOXP4 are present in alpha, beta, and delta endocrine cell types at 4 weeks.** 4W pancreatic sections were subjected to immunofluorescence analysis for FOXP1 (a-b) or FOXP4 (c-d), and endocrine hormones: . Insulin (INS), Glucagon (GCG) and Somatostatin (SST). Scale bars = 20 $\mu$ m.
