# Supplementary material
Source: PubMed Central journal article supplement (PMC4785827)
Supplement: NIHMS765277-supplement-ESM3.pdf [file NIHMS765277-supplement-ESM3.pdf]

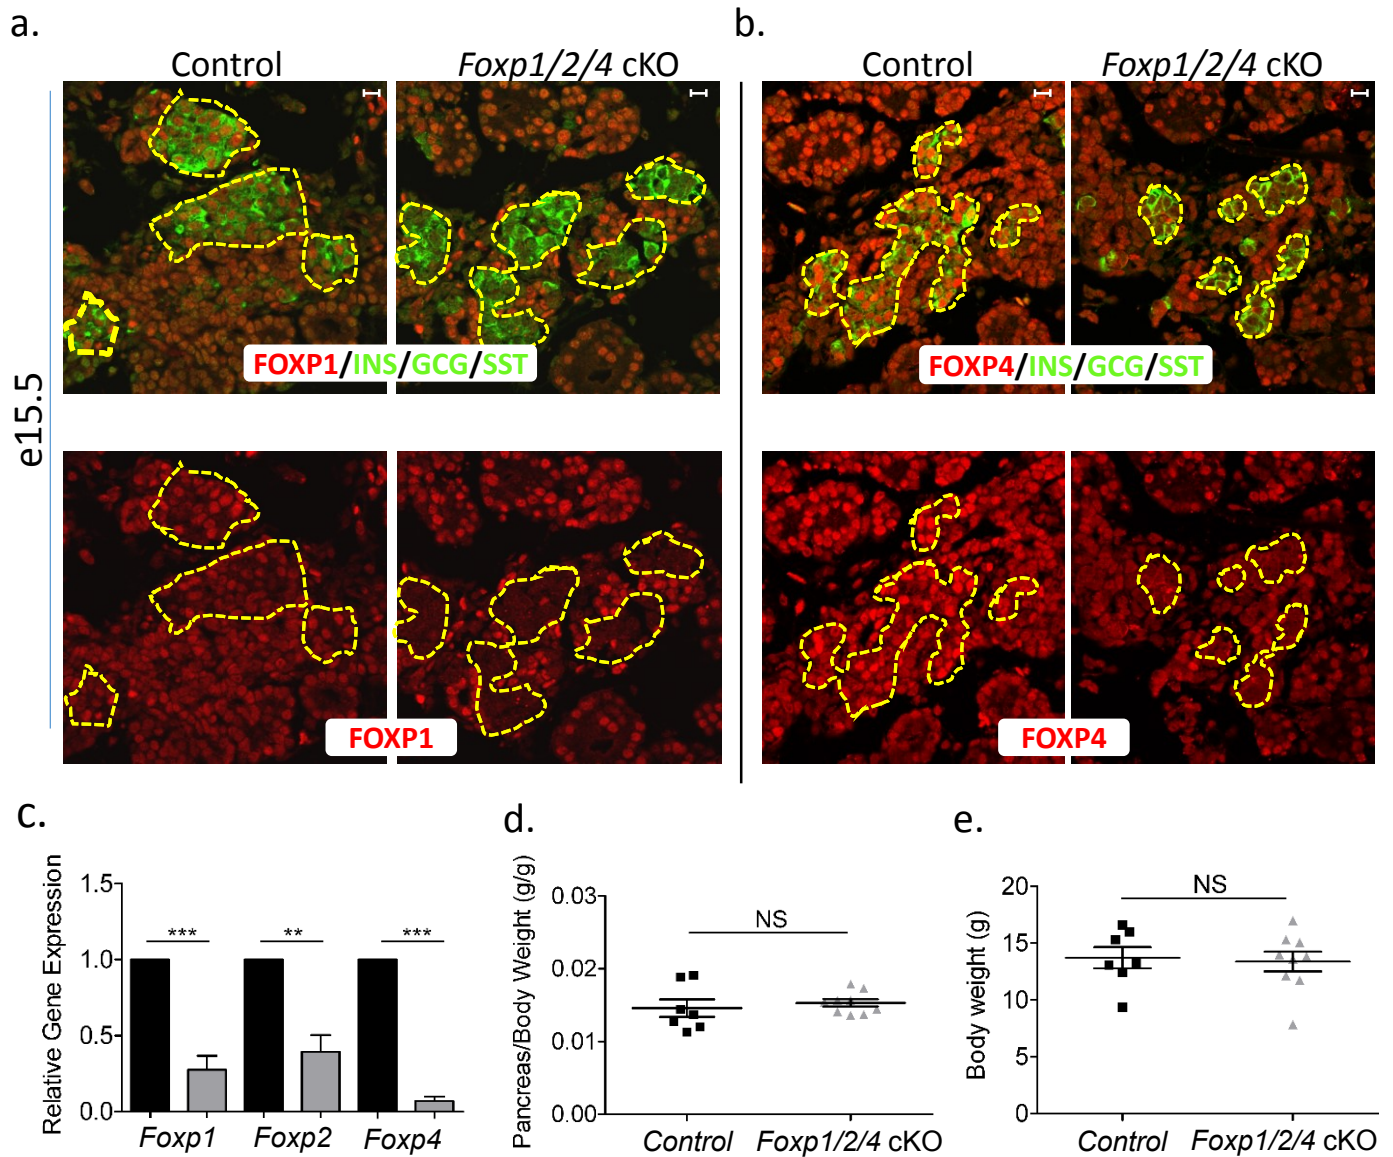

**ESM Fig. 3: FOXP1, FOXP2 and FOXP4 are efficiently removed from *Foxp1/2/4* cKO endocrine cells.** e15.5 pancreata from control and *Foxp1/2/4* cKO were subjected to immunofluorescence analysis for FOXP1 (a.), or FOXP4 (b.) and Insulin (INS), Glucagon (GCG) and Somatostatin (SST). Yellow hashed lines outline the hormone<sup>+</sup> population. c. Relative to p10 control islets, *Foxp1/2/4* cKO islets have significant reductions in *FoxP1*, *FoxP2* and *Foxp4* levels. d-e. Pancreas:body weight ratios (g/g) (d.) and average body weights (e.) were unchanged in 4W *Foxp1/2/4* cKO mutants in comparison to controls (7-control, 8-*Foxp1/2/4* cKO). \*\*, p<0.01; \*\*\*, p<0.001 after two-tailed student's t-test. Scale bars = 20µm.
