# Supplementary material
Source: PubMed Central journal article supplement (PMC4785827)
Supplement: NIHMS765277-supplement-ESM6.pdf [file NIHMS765277-supplement-ESM6.pdf]

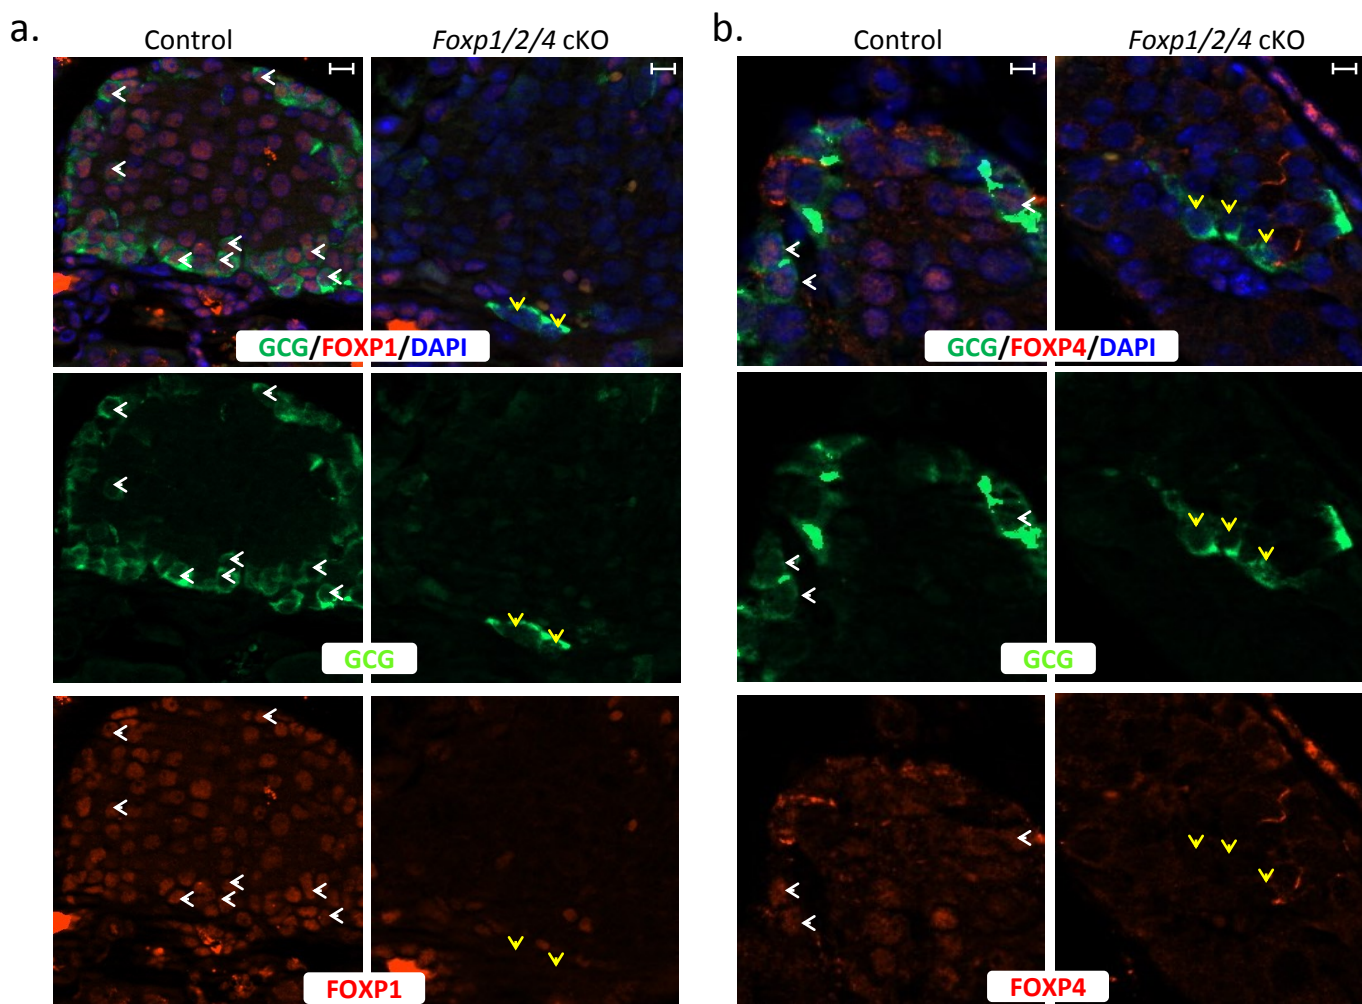

**ESM Fig. 6: FOXP1 and FOXP4 are deleted from remaining Glucagon<sup>+</sup> cells in *Foxp1/2/4* cKO mice.** Pancreata from 4W control and *Foxp1/2/4* cKO mice were monitored by immunofluorescence for Glucagon (GCG), and FOXP1 (a.) or FOXP4 (b.) White arrow head: FOXP<sup>+</sup>/Glucagon<sup>+</sup> cells; Yellow arrowhead: FOXP<sup>-</sup>/Glucagon<sup>+</sup> cells. Scale bars = 20µm.
