# Supplementary material
Source: PubMed Central journal article supplement (PMC4785827)
Supplement: NIHMS765277-supplement-ESM7.pdf [file NIHMS765277-supplement-ESM7.pdf]

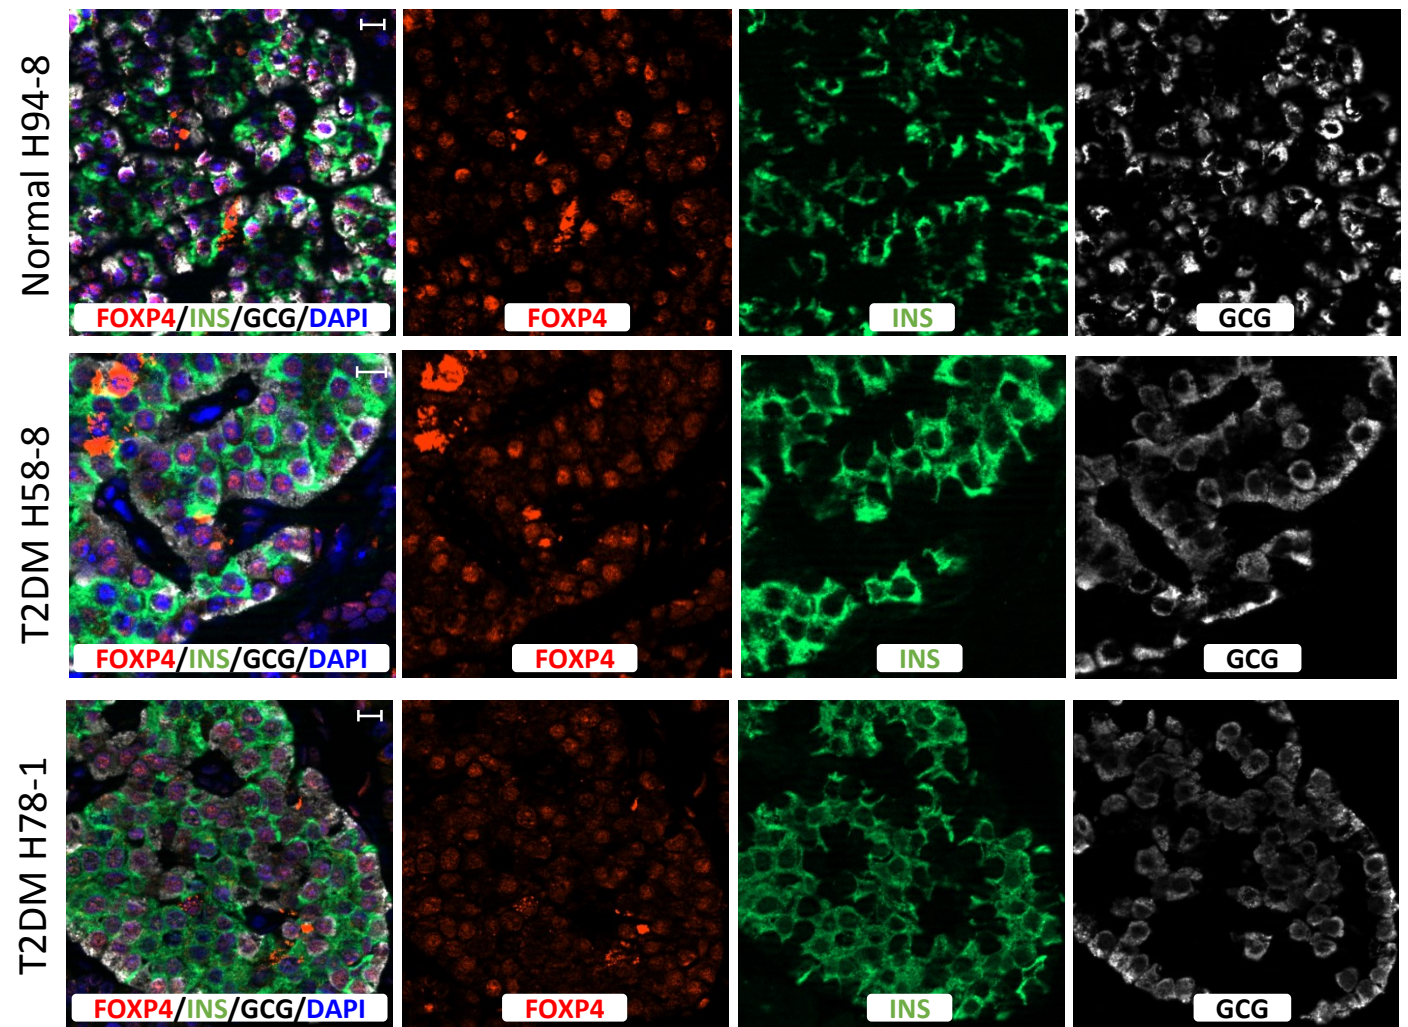

**ESM Fig. 7: FOXP4 levels appear unchanged in T2DM patients.** Pancreata from age matched normal and T2DM tissues were monitored by immunofluorescence for FOXP4, Insulin (INS) and Glucagon (GCG). Scale bars = 20 $\mu$ m.
