# Supplementary material
Source: PubMed Central journal article supplement (PMC4785827)
Supplement: NIHMS765277-supplement-ESMTable.pdf [file NIHMS765277-supplement-ESMTable.pdf]

|                | Control                                                                           | <i>Foxp1/2</i> cKO                                                                | <i>Foxp1/4</i> cKO                                                                | <i>Foxp2/4</i> cKO                                                                 | <i>Foxp1/2/4</i> cKO                                                                |
|----------------|-----------------------------------------------------------------------------------|-----------------------------------------------------------------------------------|-----------------------------------------------------------------------------------|------------------------------------------------------------------------------------|-------------------------------------------------------------------------------------|
|                |  |  |  |  |  |
| Eye appearance | Normal                                                                            | Slightly recessed                                                                 | Recessed                                                                          | Normal                                                                             | Recessed                                                                            |

**ESM Table 1: Combinations of *Foxp1*, 2 and/or 4 cKO mutants have a variable recessed eye phenotype.** Photographs of the various conditional *Foxp* knockout mice demonstrates improper eye placement.
